# Supplementary material for: Efficacy and Safety of Brucea javanica Oil Emulsion Injection for Treating Gastric Cancer: A Protocol for a Systematic Review and Meta Analysis
Source: Evid Based Complement Alternat Med. 2021 Oct 15;2021:5236454. doi: 10.1155/2021/5236454 (PMC8536405; doi:10.1155/2021/5236454)
Supplement: Supplementary Materials — S1: PRISMA 2009 checklist. S2: searching strategy in PubMed. [file 5236454.f1.zip]

Archive with 2 entries (2 files):
- 5236454.f1/supplementary file S1-PRISMA 2009 Checklist.pdf
- 5236454.f1/supplementary file S2-Searching strategy in PubMed.doc
